# Supplementary material
Source: MDPI journal article supplement (https://www.mdpi.com/2227-9717/12/5/877)
Supplement: s1 [file s1]

Archive with 3 entries (3 files):
- Supplementary Files/Part1-Answers.pdf
- Supplementary Files/Part2-Answers.pdf
- Supplementary Files/Questionnaire.pdf
