# Supplementary material
Source: MDPI journal article supplement (https://www.mdpi.com/2227-9717/12/5/877)
Supplement: s1 [file s1]

|    | C1 | C2 | C3 | C4 | C5 | C6 | C7 | C8 | C9 | C10 | C11 | C12 | C13 | C14 | C15 | C16 | C17 | C18 | C19 | C20 | C21 | C22 | C23 | C24 | C25 | C26 | C27 | C28 | C29 | C30 | C31 | C32 | C33 | C34 | C35 | C36 | C37 | C38 | C39 | C40 | C41 | C42 | C43 | 43 |   |   |   |
|----|----|----|----|----|----|----|----|----|----|-----|-----|-----|-----|-----|-----|-----|-----|-----|-----|-----|-----|-----|-----|-----|-----|-----|-----|-----|-----|-----|-----|-----|-----|-----|-----|-----|-----|-----|-----|-----|-----|-----|-----|----|---|---|---|
| 1  | 0  | 1  | 2  | 3  | 4  | 5  | 6  | 7  | 8  | 9   | 10  | 11  | 12  | 13  | 14  | 15  | 16  | 17  | 18  | 19  | 20  | 21  | 22  | 23  | 24  | 25  | 26  | 27  | 28  | 29  | 30  | 31  | 32  | 33  | 34  | 35  | 36  | 37  | 38  | 39  | 40  | 41  | 42  | 43 |   |   |   |
| 2  | 0  | 2  | 2  | 2  | 2  | 1  | 2  | 2  | 2  | 2   | 2   | 0   | 2   | 2   | 0   | 2   | 0   | 2   | 0   | 2   | 1   | 1   | 2   | 0   | 0   | 2   | 1   | 1   | 0   | 2   | 2   | 1   | 1   | 0   | 0   | 2   | 2   | 0   | 1   | 2   | 2   | 1   | 2   |    |   |   |   |
| 3  | 0  | 2  | 2  | 2  | 2  | 1  | 2  | 2  | 0  | 2   | 2   | 0   | 2   | 1   | 0   | 0   | 0   | 0   | 0   | 2   | 0   | 1   | 1   | 0   | 0   | 2   | 0   | 1   | 0   | 2   | 2   | 2   | 1   | 2   | 0   | 0   | 2   | 2   | 0   | 1   | 2   | 2   | 1   | 2  |   |   |   |
| 4  | 1  | 0  | 0  | 1  | 2  | 1  | 2  | 2  | 0  | 1   | 0   | 1   | 2   | 2   | 0   | 0   | 0   | 0   | 0   | 2   | 0   | 0   | 1   | 0   | 0   | 2   | 0   | 0   | 0   | 1   | 1   | 0   | 1   | 0   | 0   | 0   | 2   | 0   | 0   | 2   | 2   | 2   | 0   | 2  |   |   |   |
| 5  | 1  | 0  | 0  | 1  | 2  | 0  | 2  | 2  | 2  | 1   | 0   | 2   | 2   | 2   | 0   | 1   | 0   | 2   | 1   | 0   | 2   | 1   | 0   | 1   | 1   | 1   | 0   | 0   | 1   | 1   | 1   | 0   | 1   | 0   | 0   | 0   | 2   | 1   | 0   | 1   | 2   | 2   | 1   | 2  |   |   |   |
| 6  | 1  | 0  | 0  | 1  | 2  | 0  | 1  | 2  | 2  | 0   | 2   | 2   | 1   | 2   | 0   | 0   | 1   | 0   | 0   | 1   | 0   | 0   | 1   | 1   | 1   | 1   | 1   | 0   | 1   | 1   | 1   | 0   | 1   | 0   | 0   | 0   | 2   | 1   | 1   | 1   | 2   | 2   | 0   | 2  |   |   |   |
| 7  | 2  | 2  | 2  | 2  | 2  | 0  | 1  | 2  | 2  | 1   | 1   | 0   | 2   | 2   | 0   | 1   | 1   | 0   | 1   | 1   | 0   | 1   | 1   | 0   | 1   | 1   | 0   | 1   | 1   | 1   | 1   | 2   | 2   | 1   | 1   | 0   | 0   | 2   | 1   | 0   | 2   | 2   | 1   | 2  |   |   |   |
| 8  | 0  | 0  | 0  | 1  | 2  | 2  | 2  | 2  | 1  | 1   | 2   | 2   | 2   | 1   | 0   | 1   | 1   | 0   | 2   | 1   | 1   | 2   | 1   | 2   | 1   | 1   | 1   | 1   | 2   | 1   | 2   | 1   | 0   | 1   | 0   | 0   | 2   | 1   | 1   | 2   | 2   | 1   | 2   |    |   |   |   |
| 9  | 0  | 0  | 0  | 1  | 2  | 1  | 1  | 2  | 2  | 1   | 2   | 2   | 2   | 2   | 1   | 0   | 1   | 1   | 0   | 2   | 0   | 1   | 2   | 1   | 2   | 1   | 1   | 1   | 2   | 1   | 1   | 0   | 0   | 0   | 0   | 2   | 1   | 1   | 1   | 2   | 2   | 1   | 2   |    |   |   |   |
| 10 | 0  | 0  | 0  | 1  | 2  | 1  | 1  | 2  | 1  | 1   | 1   | 1   | 2   | 2   | 1   | 0   | 1   | 1   | 0   | 2   | 1   | 2   | 1   | 2   | 1   | 0   | 1   | 1   | 1   | 1   | 1   | 1   | 0   | 1   | 0   | 2   | 1   | 0   | 1   | 2   | 2   | 0   | 2   |    |   |   |   |
| 11 | 0  | 0  | 0  | 1  | 2  | 1  | 1  | 2  | 2  | 1   | 1   | 1   | 1   | 2   | 1   | 2   | 1   | 1   | 0   | 2   | 0   | 0   | 1   | 1   | 1   | 2   | 0   | 1   | 1   | 1   | 1   | 0   | 0   | 0   | 0   | 0   | 2   | 1   | 0   | 2   | 2   | 0   | 2   |    |   |   |   |
| 12 | 0  | 0  | 0  | 1  | 2  | 0  | 1  | 2  | 2  | 1   | 1   | 1   | 2   | 2   | 1   | 0   | 1   | 1   | 0   | 2   | 0   | 0   | 0   | 1   | 1   | 2   | 0   | 0   | 1   | 1   | 0   | 0   | 0   | 0   | 0   | 0   | 2   | 1   | 0   | 2   | 2   | 0   | 2   |    |   |   |   |
| 13 | 1  | 1  | 1  | 1  | 2  | 1  | 2  | 2  | 2  | 2   | 1   | 2   | 2   | 2   | 1   | 0   | 1   | 1   | 0   | 2   | 1   | 1   | 2   | 2   | 2   | 1   | 2   | 1   | 2   | 1   | 2   | 1   | 1   | 2   | 1   | 0   | 0   | 2   | 2   | 2   | 0   | 2   |     |    |   |   |   |
| 14 | 0  | 0  | 0  | 0  | 2  | 1  | 2  | 2  | 1  | 2   | 2   | 2   | 2   | 2   | 0   | 0   | 1   | 1   | 0   | 2   | 1   | 0   | 1   | 2   | 2   | 2   | 0   | 1   | 2   | 1   | 2   | 1   | 0   | 1   | 0   | 0   | 2   | 1   | 0   | 2   | 2   | 2   | 0   | 2  |   |   |   |
| 15 | 1  | 1  | 1  | 1  | 1  | 2  | 1  | 2  | 2  | 2   | 2   | 2   | 2   | 2   | 2   | 0   | 1   | 1   | 0   | 1   | 1   | 0   | 1   | 1   | 1   | 1   | 0   | 0   | 1   | 0   | 1   | 1   | 1   | 1   | 0   | 0   | 2   | 1   | 0   | 1   | 2   | 2   | 0   | 2  |   |   |   |
| 16 | 1  | 1  | 1  | 1  | 1  | 2  | 0  | 2  | 2  | 0   | 2   | 2   | 2   | 2   | 2   | 1   | 0   | 1   | 1   | 0   | 2   | 1   | 0   | 0   | 1   | 1   | 1   | 0   | 0   | 0   | 1   | 1   | 1   | 1   | 0   | 0   | 2   | 1   | 0   | 2   | 2   | 2   | 0   | 2  |   |   |   |
| 17 | 0  | 0  | 0  | 0  | 2  | 1  | 1  | 2  | 1  | 2   | 2   | 1   | 2   | 2   | 2   | 1   | 1   | 0   | 2   | 0   | 1   | 0   | 2   | 1   | 2   | 1   | 2   | 2   | 2   | 2   | 2   | 2   | 1   | 0   | 0   | 0   | 0   | 2   | 1   | 1   | 2   | 2   | 2   | 0  | 2 |   |   |
| 18 | 0  | 0  | 0  | 0  | 2  | 1  | 1  | 2  | 1  | 1   | 2   | 1   | 2   | 2   | 2   | 0   | 1   | 1   | 0   | 1   | 0   | 1   | 2   | 1   | 2   | 2   | 0   | 1   | 1   | 2   | 1   | 2   | 1   | 0   | 0   | 0   | 0   | 2   | 1   | 1   | 2   | 2   | 2   | 0  | 2 |   |   |
| 19 | 0  | 0  | 0  | 0  | 2  | 0  | 1  | 2  | 2  | 2   | 2   | 2   | 1   | 2   | 2   | 2   | 1   | 1   | 0   | 2   | 0   | 0   | 1   | 1   | 1   | 1   | 2   | 0   | 1   | 1   | 2   | 1   | 1   | 0   | 0   | 0   | 0   | 2   | 1   | 0   | 1   | 2   | 2   | 2  | 0 | 2 |   |
| 20 | 1  | 2  | 2  | 2  | 2  | 2  | 2  | 2  | 1  | 2   | 2   | 2   | 2   | 2   | 2   | 0   | 2   | 2   | 2   | 2   | 2   | 1   | 1   | 2   | 1   | 2   | 2   | 1   | 2   | 2   | 2   | 2   | 2   | 1   | 2   | 0   | 0   | 2   | 2   | 1   | 2   | 2   | 1   | 2  |   |   |   |
| 21 | 0  | 1  | 0  | 1  | 0  | 1  | 0  | 0  | 1  | 1   | 1   | 0   | 0   | 0   | 2   | 2   | 0   | 0   | 0   | 0   | 0   | 1   | 0   | 2   | 1   | 2   | 2   | 1   | 2   | 2   | 2   | 2   | 2   | 1   | 1   | 0   | 0   | 1   | 1   | 2   | 0   | 2   | 0   | 1  | 2 |   |   |
| 22 | 0  | 0  | 0  | 2  | 0  | 1  | 0  | 1  | 0  | 1   | 0   | 2   | 2   | 0   | 2   | 2   | 0   | 0   | 0   | 0   | 0   | 1   | 0   | 2   | 1   | 2   | 1   | 1   | 2   | 1   | 2   | 1   | 1   | 1   | 0   | 0   | 0   | 0   | 1   | 0   | 1   | 0   | 2   | 2  | 1 | 0 |   |
| 23 | 0  | 0  | 0  | 2  | 0  | 1  | 0  | 1  | 0  | 1   | 1   | 2   | 2   | 0   | 0   | 1   | 1   | 0   | 0   | 0   | 0   | 1   | 1   | 0   | 1   | 1   | 0   | 1   | 1   | 0   | 2   | 2   | 0   | 1   | 1   | 0   | 0   | 0   | 0   | 1   | 0   | 1   | 0   | 2  | 2 | 1 | 0 |
| 24 | 0  | 1  | 1  | 1  | 1  | 2  | 2  | 2  | 2  | 1   | 2   | 2   | 2   | 2   | 0   | 0   | 0   | 0   | 2   | 1   | 1   | 0   | 0   | 0   | 0   | 1   | 0   | 0   | 1   | 1   | 2   | 1   | 1   | 0   | 1   | 0   | 0   | 2   | 2   | 0   | 2   | 2   | 2   | 0  | 2 |   |   |
| 25 | 0  | 1  | 1  | 1  | 1  | 2  | 2  | 1  | 2  | 1   | 2   | 2   | 1   | 2   | 1   | 2   | 0   | 0   | 1   | 2   | 0   | 1   | 1   | 0   | 2   | 1   | 0   | 0   | 1   | 0   | 0   | 2   | 1   | 0   | 1   | 0   | 0   | 2   | 1   | 0   | 1   | 2   | 2   | 1  | 2 |   |   |
| 26 | 0  | 0  | 0  | 0  | 0  | 2  | 0  | 0  | 0  | 2   | 2   | 2   | 0   | 0   | 0   | 0   | 0   | 0   | 0   | 0   | 0   | 0   | 1   | 0   | 2   | 1   | 1   | 0   | 0   | 0   | 0   | 0   | 0   | 0   | 0   | 0   | 0   | 0   | 0   | 0   | 2   | 0   | 0   | 1  | 2 |   |   |
| 27 | 2  | 2  | 2  | 2  | 2  | 1  | 0  | 0  | 0  | 2   | 2   | 2   | 2   | 2   | 1   | 2   | 0   | 0   | 1   | 0   | 0   | 0   | 0   | 0   | 1   | 1   | 1   | 1   | 1   | 0   | 0   | 0   | 2   | 2   | 2   | 2   | 0   | 2   | 2   | 2   | 0   | 1   | 2   | 2  | 1 | 2 |   |
| 28 | 0  | 2  | 2  | 0  | 0  | 2  | 0  | 0  | 0  | 2   | 2   | 1   | 0   | 0   | 0   | 1   | 1   | 0   | 1   | 0   | 1   | 1   | 0   | 1   | 1   | 0   | 1   | 1   | 0   | 1   | 1   | 1   | 0   | 1   | 1   | 0   | 0   | 0   | 0   | 0   | 1   | 1   | 2   | 2  | 0 | 1 |   |
| 29 | 2  | 2  | 2  | 2  | 2  | 1  | 2  | 2  | 2  | 2   | 2   | 2   | 1   | 2   | 1   | 0   | 0   | 0   | 1   | 1   | 0   | 1   | 1   | 1   | 1   | 1   | 0   | 2   | 0   | 2   | 2   | 2   | 2   | 2   | 2   | 0   | 1   | 2   | 0   | 0   | 1   | 2   | 2   | 1  | 2 |   |   |
| 30 | 1  | 1  | 1  | 1  | 1  | 0  | 1  | 0  | 0  | 2   | 2   | 0   | 0   | 1   | 2   | 0   | 0   | 0   | 1   | 0   | 0   | 1   | 0   | 1   | 0   | 1   | 1   | 0   | 0   | 0   | 0   | 1   | 1   | 1   | 0   | 0   | 0   | 0   | 0   | 1   | 0   | 1   | 1   | 1  | 1 |   |   |
| 31 | 1  | 1  | 1  | 1  | 1  | 0  | 1  | 0  | 0  | 1   | 1   | 0   | 2   | 2   | 1   | 0   | 0   | 0   | 0   | 1   | 0   | 0   | 1   | 1   | 1   | 1   | 0   | 0   | 0   | 1   | 0   | 0   | 1   | 1   | 1   | 0   | 0   | 0   | 1   | 0   | 0   | 0   | 1   | 0  | 1 |   |   |
| 32 | 0  | 0  | 0  | 0  | 0  | 0  | 1  | 0  | 1  | 0   | 1   | 2   | 2   | 2   | 1   | 0   | 0   | 0   | 0   | 1   | 0   | 0   | 2   | 1   | 1   | 0   | 0   | 0   | 1   | 0   | 0   | 0   | 0   | 0   | 0   | 0   | 0   | 0   | 2   | 0   | 0   | 1   | 0   | 1  | 0 |   |   |
| 33 | 0  | 0  | 0  | 0  | 0  | 0  | 1  | 1  | 0  | 0   | 1   | 1   | 0   | 1   | 1   | 0   | 0   | 0   | 0   | 0   | 0   | 1   | 1   | 0   | 0   | 0   | 0   | 0   | 0   | 0   | 0   | 0   | 0   | 0   | 0   | 0   | 0   | 0   | 0   | 0   | 0   | 0   | 1   | 1  | 1 |   |   |
| 34 | 0  | 0  | 0  | 0  | 0  | 0  | 1  | 1  | 0  | 0   | 1   | 0   | 0   | 1   | 2   | 0   | 0   | 0   | 0   | 0   | 0   | 0   | 1   | 0   | 0   | 0   | 0   | 0   | 0   | 0   | 0   | 0   | 0   | 0   | 0   | 0   | 0   | 0   | 0   | 0   | 0   | 0   | 1   | 0  | 1 |   |   |
| 35 | 0  | 0  | 0  | 0  | 0  | 0  | 1  | 0  | 0  | 1   | 0   | 0   | 0   | 0   | 2   | 0   | 0   | 0   | 0   | 0   | 0   | 0   | 0   | 0   | 0   | 0   | 0   | 0   | 0   | 0   | 0   | 0   | 0   | 0   | 0   | 0   | 0   | 0   | 0   | 0   | 0   | 0   | 1   | 0  | 0 |   |   |
| 36 | 0  | 0  | 0  | 0  | 0  | 2  | 1  | 1  | 0  | 1   | 0   | 0   | 2   | 2   | 1   | 0   | 0   | 0   | 0   | 0   | 0   | 0   | 0   | 0   | 0   | 1   | 1   | 0   | 0   | 0   | 0   | 0   | 0   | 0   | 0   | 0   | 0   | 2   | 2   | 0   | 0   | 2   | 2   | 0  | 1 |   |   |
| 37 | 0  | 0  | 0  | 0  | 0  | 1  | 0  | 0  | 0  | 0   | 0   | 0   | 2   | 0   | 0   | 0   | 0   | 0   | 0   | 0   | 1   | 1   | 0   | 1   | 0   | 0   | 1   | 1   | 0   | 2   | 1   | 0   | 0   | 0   | 0   | 0   | 0   | 0   | 0   | 0   | 0   | 2   | 1   | 1  | 0 |   |   |
| 38 | 1  | 1  | 1  | 1  | 2  | 2  | 2  | 2  | 1  | 0   | 1   | 2   | 2   | 2   | 2   | 0   | 0   | 0   | 0   | 0   | 2   | 0   | 0   | 0   | 0   | 0   | 0   | 0   | 1   | 2   | 1   | 1   | 1   | 1   | 2   | 1   | 1   | 2   | 1   | 2   | 0   | 0   | 2   | 2  | 0 |   |   |
| 39 | 0  | 2  | 2  | 2  | 0  | 1  | 0  | 1  | 2  | 1   | 2   | 1   | 2   | 2   | 1   | 2   | 0   | 0   | 0   | 2   | 2   | 0   | 0   | 0   | 0   | 2   | 1   | 1   | 2   | 2   | 2   | 2   | 1   | 0   | 1   | 0   | 0   | 0   | 2   | 1   | 2   | 0   | 2   | 2  | 0 |   |   |
| 40 | 0  | 1  | 1  | 1  | 2  | 1  | 2  | 1  | 2  | 1   | 2   | 1   | 2   | 1   | 2   | 0   | 1   | 1   | 0   | 2   | 1   | 0   | 2   | 1   | 0   | 2   | 1   | 1   | 1   | 2   | 2   | 0   | 0   | 0   | 0   | 0   | 0   | 2   | 2   | 1   | 2   | 2   | 2   | 0  | 1 |   |   |
| 41 | 0  | 0  | 0  | 0  | 0  | 0  | 1  | 2  | 0  | 1   | 2   | 0   | 2   | 0   | 2   | 0   | 1   | 0   | 1   | 2   | 0   | 0   | 2   | 0   | 2   | 2   | 1   | 2   | 0   | 2   | 2   | 0   | 0   | 0   | 0   | 0   | 0   | 0   | 2   | 0   | 2   | 2   | 2   | 2  | 0 |   |   |
| 42 | 0  | 1  | 1  | 1  | 0  | 0  | 0  | 1  | 1  | 0   | 0   | 0   | 2   | 2   | 0   | 0   | 0   | 0   | 0   | 0   | 0   | 0   | 0   | 0   | 0   | 2   | 0   | 0   | 0   | 0   | 0   | 0   | 0   | 0   | 0   | 0   | 0   | 0   | 0   | 0   | 0   | 1   | 1   | 0  |   |   |   |
| 43 | 0  | 0  | 0  | 0  | 0  | 0  | 0  | 0  | 0  | 0   | 0   | 0   | 1   | 2   | 0   | 0   | 0   | 0   | 0   | 0   | 0   | 0   | 0   | 0   | 0   | 0   | 0   | 0   | 0   | 0   | 0   | 0   | 0   | 0   | 0   | 0   | 0   | 0   | 0   | 0   | 1   | 0   | 0   |    |   |   |   |
| 44 | 0  | 1  | 1  | 1  | 0  | 2  | 1  | 1  | 2  | 0   | 0   |     |     |     |     |     |     |     |     |     |     |     |     |     |     |     |     |     |     |     |     |     |     |     |     |     |     |     |     |     |     |     |     |    |   |   |   |

| C44 | C45 | C46 | C47 | C48 | C49 | C50 | C51 | C52 | C53 | C54 | C55 | C56 | C57 | C58 | C59 | C60 | C61 | C62 | C63 | C64 | C65 | C66 | C67 | C68 | C69 | C70 | C71 | C72 | C73 | C74 | C75 | C76 | C77 | C78 | C79 | C80 | C81 | C82 | C83 | C84 | C85 | C86 | C87 |   |
|-----|-----|-----|-----|-----|-----|-----|-----|-----|-----|-----|-----|-----|-----|-----|-----|-----|-----|-----|-----|-----|-----|-----|-----|-----|-----|-----|-----|-----|-----|-----|-----|-----|-----|-----|-----|-----|-----|-----|-----|-----|-----|-----|-----|---|
| 2   | 1   | 0   | 2   | 1   | 0   | 1   | 0   | 2   | 1   | 1   | 0   | 0   | 1   | 0   | 0   | 0   | 1   | 2   | 0   | 0   | 2   | 1   | 2   | 0   | 0   | 2   | 2   | 0   | 0   | 0   | 2   | 0   | 2   | 0   | 2   | 0   | 2   | 0   | 2   | 0   | 0   | 1   | 2   |   |
| 2   | 1   | 0   | 2   | 1   | 0   | 2   | 2   | 2   | 2   | 2   | 0   | 0   | 1   | 0   | 0   | 0   | 2   | 1   | 0   | 0   | 0   | 2   | 2   | 0   | 1   | 2   | 1   | 0   | 0   | 0   | 2   | 0   | 2   | 0   | 2   | 0   | 2   | 0   | 2   | 0   | 0   | 0   | 2   |   |
| 2   | 0   | 0   | 0   | 2   | 0   | 2   | 2   | 1   | 0   | 2   | 2   | 0   | 2   | 2   | 0   | 0   | 2   | 2   | 2   | 0   | 2   | 2   | 2   | 0   | 2   | 1   | 0   | 0   | 0   | 2   | 0   | 2   | 0   | 2   | 0   | 2   | 0   | 2   | 0   | 2   | 0   | 1   | 0   |   |
| 2   | 0   | 1   | 2   | 1   | 0   | 1   | 0   | 2   | 1   | 2   | 2   | 2   | 2   | 0   | 2   | 0   | 0   | 2   | 2   | 2   | 2   | 2   | 2   | 1   | 2   | 1   | 1   | 0   | 0   | 0   | 2   | 0   | 1   | 1   | 0   | 0   | 1   | 0   | 2   | 0   | 0   | 1   | 0   |   |
| 2   | 1   | 1   | 1   | 0   | 0   | 1   | 1   | 2   | 1   | 1   | 0   | 0   | 0   | 0   | 0   | 0   | 0   | 0   | 0   | 0   | 0   | 0   | 2   | 1   | 2   | 2   | 2   | 0   | 0   | 0   | 1   | 0   | 1   | 1   | 0   | 0   | 1   | 0   | 1   | 1   | 0   | 1   | 0   |   |
| 2   | 1   | 1   | 1   | 1   | 1   | 1   | 0   | 2   | 2   | 2   | 1   | 0   | 1   | 0   | 0   | 0   | 2   | 2   | 0   | 0   | 0   | 0   | 2   | 2   | 2   | 2   | 1   | 0   | 0   | 0   | 1   | 0   | 1   | 2   | 1   | 0   | 1   | 0   | 1   | 0   | 1   | 1   |     |   |
| 1   | 1   | 1   | 2   | 2   | 1   | 1   | 1   | 2   | 2   | 2   | 0   | 0   | 0   | 0   | 0   | 2   | 2   | 2   | 0   | 0   | 1   | 2   | 1   | 2   | 1   | 1   | 2   | 0   | 0   | 1   | 1   | 1   | 1   | 1   | 1   | 1   | 1   | 0   | 1   | 0   | 1   | 0   | 1   |   |
| 1   | 0   | 1   | 2   | 1   | 1   | 1   | 0   | 2   | 1   | 1   | 0   | 0   | 1   | 0   | 1   | 0   | 1   | 1   | 1   | 0   | 0   | 1   | 2   | 1   | 1   | 1   | 1   | 0   | 1   | 0   | 1   | 1   | 1   | 1   | 1   | 2   | 1   | 1   | 0   | 1   | 1   | 0   | 1   |   |
| 1   | 0   | 0   | 2   | 1   | 1   | 0   | 0   | 1   | 1   | 1   | 0   | 0   | 0   | 1   | 0   | 1   | 1   | 1   | 0   | 0   | 0   | 1   | 2   | 0   | 2   | 1   | 1   | 0   | 0   | 1   | 0   | 2   | 1   | 1   | 0   | 2   | 1   | 1   | 0   | 2   | 1   | 0   | 1   |   |
| 2   | 1   | 0   | 2   | 2   | 1   | 0   | 0   | 2   | 2   | 1   | 0   | 0   | 0   | 0   | 0   | 0   | 1   | 2   | 1   | 0   | 0   | 1   | 2   | 0   | 0   | 0   | 0   | 0   | 0   | 1   | 0   | 2   | 2   | 1   | 1   | 0   | 2   | 1   | 1   | 0   | 0   | 1   |     |   |
| 2   | 0   | 0   | 2   | 2   | 1   | 2   | 0   | 2   | 1   | 2   | 0   | 0   | 0   | 0   | 0   | 0   | 2   | 2   | 2   | 2   | 2   | 2   | 1   | 2   | 2   | 2   | 1   | 1   | 0   | 1   | 1   | 2   | 2   | 1   | 1   | 1   | 2   | 2   | 1   | 1   | 1   | 1   | 1   |   |
| 1   | 0   | 1   | 1   | 2   | 0   | 1   | 0   | 2   | 2   | 1   | 0   | 0   | 0   | 0   | 0   | 0   | 1   | 1   | 2   | 0   | 0   | 1   | 2   | 0   | 2   | 2   | 2   | 0   | 0   | 1   | 1   | 2   | 1   | 1   | 0   | 1   | 1   | 2   | 1   | 2   | 0   | 1   | 1   |   |
| 1   | 0   | 0   | 2   | 2   | 0   | 1   | 0   | 2   | 1   | 0   | 0   | 0   | 0   | 0   | 0   | 0   | 0   | 0   | 0   | 0   | 0   | 1   | 2   | 0   | 2   | 2   | 2   | 0   | 0   | 1   | 2   | 2   | 1   | 1   | 0   | 1   | 1   | 2   | 1   | 1   | 1   | 1   | 1   |   |
| 2   | 0   | 1   | 2   | 2   | 1   | 1   | 1   | 2   | 2   | 2   | 1   | 0   | 0   | 1   | 0   | 2   | 2   | 2   | 2   | 2   | 2   | 2   | 2   | 1   | 2   | 2   | 1   | 0   | 1   | 1   | 1   | 1   | 1   | 2   | 2   | 1   | 2   | 1   | 1   | 1   | 1   | 1   | 1   |   |
| 2   | 1   | 0   | 2   | 2   | 1   | 1   | 0   | 2   | 2   | 2   | 1   | 0   | 0   | 1   | 0   | 2   | 2   | 2   | 2   | 2   | 2   | 2   | 2   | 2   | 2   | 2   | 1   | 0   | 1   | 1   | 1   | 1   | 1   | 1   | 1   | 1   | 1   | 1   | 1   | 1   | 1   | 1   | 1   |   |
| 2   | 1   | 0   | 2   | 2   | 1   | 1   | 0   | 2   | 2   | 2   | 1   | 0   | 0   | 1   | 1   | 0   | 1   | 1   | 1   | 1   | 1   | 1   | 1   | 1   | 1   | 1   | 1   | 0   | 1   | 1   | 1   | 1   | 1   | 1   | 1   | 1   | 1   | 1   | 1   | 1   | 1   | 1   | 1   |   |
| 0   | 1   | 1   | 0   | 2   | 1   | 2   | 1   | 2   | 2   | 2   | 0   | 2   | 2   | 2   | 2   | 1   | 1   | 0   | 2   | 2   | 2   | 2   | 1   | 0   | 2   | 2   | 0   | 0   | 0   | 0   | 0   | 0   | 0   | 0   | 0   | 2   | 0   | 2   | 0   | 0   | 0   | 2   | 0   |   |
| 0   | 1   | 0   | 0   | 2   | 1   | 1   | 0   | 2   | 2   | 2   | 0   | 0   | 1   | 1   | 0   | 0   | 1   | 0   | 0   | 0   | 0   | 0   | 1   | 0   | 2   | 2   | 0   | 0   | 1   | 0   | 1   | 1   | 1   | 0   | 0   | 0   | 1   | 0   | 0   | 1   | 1   | 2   | 0   |   |
| 2   | 0   | 0   | 0   | 2   | 0   | 1   | 0   | 0   | 0   | 0   | 0   | 0   | 0   | 0   | 2   | 2   | 0   | 0   | 0   | 0   | 0   | 0   | 0   | 2   | 0   | 1   | 2   | 0   | 0   | 0   | 2   | 2   | 0   | 0   | 0   | 0   | 0   | 1   | 0   | 0   | 1   | 2   | 0   |   |
| 2   | 0   | 0   | 0   | 2   | 0   | 0   | 2   | 0   | 0   | 0   | 0   | 0   | 0   | 0   | 0   | 0   | 0   | 1   | 0   | 0   | 0   | 0   | 2   | 2   | 2   | 2   | 1   | 2   | 1   | 0   | 1   | 0   | 2   | 2   | 0   | 2   | 1   | 0   | 2   | 2   | 0   | 0   |     |   |
| 0   | 1   | 0   | 0   | 0   | 0   | 0   | 0   | 0   | 2   | 2   | 0   | 0   | 0   | 2   | 2   | 0   | 0   | 2   | 0   | 0   | 0   | 0   | 0   | 2   | 0   | 0   | 2   | 2   | 0   | 0   | 0   | 0   | 0   | 0   | 0   | 0   | 0   | 0   | 0   | 1   | 0   | 0   | 0   |   |
| 2   | 0   | 1   | 1   | 1   | 0   | 0   | 0   | 0   | 2   | 2   | 2   | 0   | 0   | 2   | 1   | 0   | 0   | 2   | 0   | 2   | 2   | 2   | 0   | 2   | 0   | 2   | 1   | 2   | 0   | 2   | 0   | 0   | 2   | 0   | 0   | 0   | 0   | 0   | 0   | 0   | 2   | 2   | 1   | 0 |
| 0   | 0   | 0   | 0   | 1   | 0   | 0   | 0   | 0   | 0   | 0   | 0   | 0   | 0   | 0   | 0   | 0   | 0   | 0   | 0   | 0   | 0   | 0   | 0   | 0   | 0   | 0   | 0   | 0   | 0   | 0   | 0   | 0   | 0   | 0   | 0   | 0   | 0   | 0   | 0   | 0   | 0   | 0   |     |   |
| 2   | 0   | 0   | 1   | 1   | 0   | 0   | 0   | 0   | 2   | 2   | 0   | 0   | 0   | 0   | 0   | 0   | 1   | 1   | 0   | 0   | 0   | 0   | 1   | 0   | 1   | 1   | 1   | 0   | 2   | 1   | 0   | 2   | 1   | 0   | 2   | 0   | 0   | 0   | 0   | 2   | 2   | 0   | 0   |   |
| 0   | 0   | 0   | 1   | 0   | 0   | 0   | 0   | 0   | 0   | 0   | 0   | 0   | 0   | 0   | 0   | 0   | 0   | 0   | 0   | 0   | 0   | 0   | 0   | 0   | 0   | 0   | 0   | 0   | 0   | 0   | 0   | 0   | 0   | 0   | 0   | 0   | 0   | 0   | 0   | 0   | 0   | 0   |     |   |
| 0   | 0   | 0   | 1   | 0   | 0   | 0   | 0   | 0   | 0   | 0   | 0   | 0   | 0   | 0   | 0   | 0   | 0   | 0   | 0   | 0   | 0   | 0   | 0   | 0   | 0   | 0   | 0   | 0   | 0   | 0   | 0   | 0   | 0   | 0   | 0   | 0   | 0   | 0   | 0   | 0   | 0   | 0   |     |   |
| 0   | 0   | 0   | 1   | 0   | 0   | 0   | 0   | 0   | 0   | 0   | 0   | 0   | 0   | 0   | 0   | 0   | 0   | 0   | 0   | 0   | 0   | 0   | 0   | 0   | 0   | 0   | 0   | 0   | 0   | 0   | 0   | 0   | 0   | 0   | 0   | 0   | 0   | 0   | 0   | 0   | 0   | 0   |     |   |
| 0   | 0   | 0   | 1   | 0   | 0   | 0   | 0   | 0   | 0   | 0   | 0   | 0   | 0   | 0   | 0   | 0   | 0   | 0   | 0   | 0   | 0   | 0   | 0   | 0   | 0   | 0   | 0   | 0   | 0   | 0   | 0   | 0   | 0   | 0   | 0   | 0   | 0   | 0   | 0   | 0   | 0   | 0   |     |   |
| 0   | 0   | 0   | 1   | 0   | 0   | 0   | 0   | 0   | 0   | 0   | 0   | 0   | 0   | 0   | 0   | 0   | 0   | 0   | 0   | 0   | 0   | 0   | 0   | 0   | 0   | 0   | 0   | 0   | 0   | 0   | 0   | 0   | 0   | 0   | 0   | 0   | 0   | 0   | 0   | 0   | 0   | 0   |     |   |
| 0   | 0   | 0   | 1   | 0   | 0   | 0   | 0   | 0   | 0   | 0   | 0   | 0   | 0   | 0   | 0   | 0   | 0   | 0   | 0   | 0   | 0   | 0   | 0   | 0   | 0   | 0   | 0   | 0   | 0   | 0   | 0   | 0   | 0   | 0   | 0   | 0   | 0   | 0   | 0   | 0   | 0   | 0   |     |   |
| 0   | 0   | 0   | 1   | 0   | 0   | 0   | 0   | 0   | 0   | 0   | 0   | 0   | 0   | 0   | 0   | 0   | 0   | 0   | 0   | 0   | 0   | 0   | 0   | 0   | 0   | 0   | 0   | 0   | 0   | 0   | 0   | 0   | 0   | 0   | 0   | 0   | 0   | 0   | 0   | 0   | 0   | 0   |     |   |
| 0   | 0   | 0   | 1   | 0   | 0   | 0   | 0   | 0   | 0   | 0   | 0   | 0   | 0   | 0   | 0   | 0   | 0   | 0   | 0   | 0   | 0   | 0   | 0   | 0   | 0   | 0   | 0   | 0   | 0   | 0   | 0   | 0   | 0   | 0   | 0   | 0   | 0   | 0   | 0   | 0   | 0   | 0   |     |   |
| 0   | 0   | 0   | 1   | 0   | 0   | 0   | 0   | 0   | 0   | 0   | 0   | 0   | 0   | 0   | 0   | 0   | 0   | 0   | 0   | 0   | 0   | 0   | 0   | 0   | 0   | 0   | 0   | 0   | 0   | 0   | 0   | 0   | 0   | 0   | 0   | 0   | 0   | 0   | 0   | 0   | 0   | 0   |     |   |
| 0   | 0   | 0   | 1   | 0   | 0   | 0   | 0   | 0   | 0   | 0   | 0   | 0   | 0   | 0   | 0   | 0   | 0   | 0   | 0   | 0   | 0   | 0   | 0   | 0   | 0   | 0   | 0   | 0   | 0   | 0   | 0   | 0   | 0   | 0   | 0   | 0   | 0   | 0   | 0   | 0   | 0   | 0   |     |   |
| 0   | 0   | 0   | 1   | 0   | 0   | 0   | 0   | 0   | 0   | 0   | 0   | 0   | 0   | 0   | 0   | 0   | 0   | 0   | 0   | 0   | 0   | 0   | 0   | 0   | 0   | 0   | 0   | 0   | 0   | 0   | 0   | 0   | 0   | 0   | 0   | 0   | 0   | 0   | 0   | 0   | 0   | 0   |     |   |
| 0   | 0   | 0   | 1   | 0   | 0   | 0   | 0   | 0   | 0   | 0   | 0   | 0   | 0   | 0   | 0   | 0   | 0   | 0   | 0   | 0   | 0   | 0   | 0   | 0   | 0   | 0   | 0   | 0   | 0   | 0   | 0   | 0   | 0   | 0   | 0   | 0   | 0   | 0   | 0   | 0   | 0   | 0   |     |   |
| 0   | 0   | 0   | 1   | 0   | 0   | 0   | 0   | 0   | 0   | 0   | 0   | 0   | 0   | 0   | 0   | 0   | 0   | 0   | 0   | 0   | 0   | 0   | 0   | 0   | 0   | 0   | 0   | 0   | 0   | 0   | 0   | 0   | 0   | 0   | 0   | 0   | 0   | 0   | 0   | 0   | 0   | 0   |     |   |
| 0   | 0   | 0   | 1   | 0   | 0   | 0   | 0   | 0   | 0   | 0   | 0   | 0   | 0   | 0   | 0   | 0   | 0   | 0   | 0   | 0   | 0   | 0   | 0   | 0   | 0   | 0   | 0   | 0   | 0   | 0   | 0   | 0   | 0   | 0   | 0   | 0   | 0   | 0   | 0   | 0   | 0   | 0   |     |   |
| 0   | 0   | 0   | 1   | 0   | 0   | 0   | 0   | 0   | 0   | 0   | 0   | 0   | 0   | 0   | 0   | 0   | 0   | 0   | 0   | 0   | 0   | 0   | 0   | 0   | 0   | 0   | 0   | 0   | 0   | 0   | 0   | 0   | 0   | 0   | 0   | 0   | 0   | 0   | 0   | 0   | 0   | 0   |     |   |
| 0   | 0   | 0   | 1   | 0   | 0   | 0   | 0   | 0   | 0   | 0   | 0   | 0   | 0   | 0   | 0   | 0   | 0   | 0   | 0   | 0   | 0   | 0   | 0   | 0   | 0   | 0   | 0   | 0   | 0   | 0   | 0   | 0   | 0   | 0   | 0   | 0   | 0   | 0   | 0   | 0   | 0   | 0   |     |   |
| 0   | 0   | 0   | 1   | 0   | 0   | 0   | 0   | 0   | 0   | 0   | 0   | 0   | 0   | 0   | 0   | 0   | 0   | 0   | 0   | 0   | 0   | 0   | 0   | 0   | 0   | 0   | 0   | 0   | 0   | 0   | 0   | 0   | 0   | 0   | 0   | 0   | 0   | 0   | 0   | 0   | 0   | 0   |     |   |
| 0   | 0   | 0   | 1   | 0   | 0   | 0   | 0   | 0   | 0   | 0   | 0   | 0   | 0   | 0   | 0   | 0   | 0   | 0   | 0   | 0   | 0   | 0   | 0   | 0   | 0   | 0   | 0   | 0   | 0   | 0   | 0   | 0   | 0   | 0   | 0   | 0   | 0   | 0   | 0   | 0   | 0   | 0   |     |   |
| 0   | 0   | 0   | 1   | 0   | 0   | 0   | 0   | 0   | 0   | 0   | 0   | 0   | 0   | 0   | 0   | 0   | 0   | 0   | 0   | 0   | 0   | 0   | 0   | 0   | 0   | 0   | 0   | 0   | 0   | 0   | 0   | 0   | 0   | 0   | 0   | 0   | 0   | 0   | 0   | 0   | 0   | 0   |     |   |
| 0   | 0   | 0   | 1   | 0   | 0   | 0   | 0   | 0   | 0   | 0   | 0   | 0   | 0   | 0   | 0   | 0   | 0   | 0   | 0   | 0   | 0   | 0   | 0   | 0   | 0   | 0   | 0   | 0   | 0   | 0   | 0   | 0   | 0   | 0   | 0   | 0   | 0   | 0   | 0   | 0   | 0   | 0   |     |   |
| 0   | 0   | 0   | 1   | 0   | 0   | 0   | 0   | 0   | 0   | 0   | 0   | 0   | 0   | 0   | 0   | 0   | 0   | 0   | 0   | 0   | 0   | 0   | 0   | 0   | 0   | 0   | 0   | 0   | 0   | 0   | 0   | 0   | 0   | 0   | 0   | 0   | 0   | 0   | 0   | 0   | 0   | 0   |     |   |
| 0   | 0   | 0   | 1   | 0   | 0   | 0   | 0   | 0   | 0   | 0   | 0   | 0   | 0   | 0   | 0   | 0   | 0   | 0   | 0   | 0   | 0   | 0   | 0   | 0   |     |     |     |     |     |     |     |     |     |     |     |     |     |     |     |     |     |     |     |   |



| C132 | C133 | C134 | C135 |
|------|------|------|------|
| 2    | 1    | 2    | 0    |
| 2    | 2    | 2    | 0    |
| 2    | 1    | 2    | 0    |
| 2    | 0    | 1    | 0    |
| 2    | 2    | 1    | 1    |
| 2    | 1    | 1    | 1    |
| 2    | 1    | 2    | 0    |
| 2    | 1    | 1    | 1    |
| 2    | 1    | 1    | 1    |
| 2    | 1    | 1    | 1    |
| 2    | 1    | 1    | 1    |
| 2    | 0    | 1    | 2    |
| 2    | 0    | 0    | 2    |
| 2    | 2    | 1    | 1    |
| 2    | 1    | 1    | 1    |
| 2    | 2    | 0    | 1    |
| 2    | 2    | 0    | 1    |
| 2    | 2    | 2    | 1    |
| 0    | 2    | 1    | 1    |
| 0    | 2    | 2    | 1    |
| 2    | 2    | 1    | 1    |
| 2    | 2    | 1    | 0    |
| 2    | 1    | 1    | 0    |
| 0    | 0    | 0    | 0    |
| 2    | 1    | 2    | 0    |
| 0    | 2    | 1    | 0    |
| 0    | 2    | 1    | 0    |
| 0    | 1    | 1    | 1    |
| 0    | 1    | 0    | 1    |
| 0    | 1    | 0    | 0    |
| 0    | 2    | 0    | 0    |
| 0    | 2    | 0    | 0    |
| 2    | 1    | 0    | 0    |
| 2    | 1    | 1    | 0    |
| 2    | 2    | 1    | 1    |
| 0    | 2    | 0    | 0    |
| 0    | 2    | 1    | 0    |
| 0    | 2    | 0    | 0    |
| 0    | 1    | 1    | 0    |
| 0    | 1    | 0    | 0    |
| 0    | 2    | 0    | 0    |
| 0    | 2    | 1    | 0    |
| 2    | 1    | 0    | 2    |
| 2    | 0    | 1    | 1    |
| 1    | 1    | 2    | 1    |
| 2    | 2    | 2    | 1    |
| 2    | 2    | 2    | 1    |
| 2    | 2    | 2    | 1    |
| 2    | 1    | 2    | 0    |
| 2    | 1    | 1    | 1    |
| 2    | 2    | 1    | 1    |
| 2    | 1    | 0    | 1    |
| 2    | 1    | 0    | 1    |
| 2    | 2    | 1    | 2    |
| 2    | 2    | 1    | 2    |
| 2    | 1    | 0    | 1    |
| 2    | 1    | 0    | 1    |
| 2    | 2    | 1    | 2    |
| 1    | 1    | 2    | 2    |
| 2    | 1    | 2    | 2    |
| 1    | 2    | 2    | 1    |
| 2    | 1    | 2    | 1    |
| 2    | 2    | 2    | 1    |
| 2    | 2    | 2    | 1    |
| 2    | 2    | 2    | 1    |
| 2    | 2    | 2    | 0    |
| 2    | 2    | 2    | 0    |
| 2    | 2    | 2    | 0    |
| 2    | 2    | 2    | 0    |
| 2    | 2    | 2    | 0    |
| 2    | 2    | 2    | 0    |
| 2    | 2    | 2    | 0    |
| 1    | 1    | 0    | 0    |
| 1    | 2    | 1    | 0    |
| 1    | 1    | 1    | 0    |
| 2    | 1    | 1    | 0    |
| 1    | 1    | 0    | 0    |
| 1    | 2    | 0    | 0    |
| 2    | 2    | 1    | 0    |
| 2    | 2    | 1    | 0    |
| 2    | 1    | 1    | 0    |
| 2    | 1    | 1    | 0    |
| 2    | 2    | 1    | 0    |
| 0    | 1    | 1    | 0    |
| 0    | 1    | 1    | 0    |
| 0    | 1    | 1    | 0    |
| 2    | 1    | 1    | 0    |
