# Supplementary material
Source: MDPI journal article supplement (https://www.mdpi.com/2227-9717/12/5/877)
Supplement: s1 [file s1]

| <b>TERRITORY</b>         |    |        |
|--------------------------|----|--------|
| City of Belgrade         | 20 | 14.81% |
| Vojvodina                | 30 | 22.22% |
| Sumadija and West Serbia | 31 | 22.96% |
| South and East Serbia    | 54 | 40.00% |

135 100.00%

| <b>ECONOMIC ACTIVITY</b>                  |    |        |
|-------------------------------------------|----|--------|
| Agriculture                               | 12 | 8.89%  |
| Wood industry                             | 26 | 19.26% |
| Energy sector                             | 4  | 2.96%  |
| Automotive sector                         | 6  | 4.44%  |
| Construction sector                       | 6  | 4.44%  |
| Chemistry, rubber and non-metals industry | 13 | 9.63%  |
| Metal processing and mining sector        | 32 | 23.70% |
| Food industry                             | 34 | 25.19% |
| Farmaceutical industry                    | 1  | 0.74%  |
| Textile and leather industry              | 1  | 0.74%  |

135

| <b>ORGANIZATION SIZE</b>                            |    |        |
|-----------------------------------------------------|----|--------|
| Micro enterprises (up to 10 employees)              | 45 | 33.33% |
| Small enterprises (from 11 to 50 employees)         | 41 | 30.37% |
| Medium-sized enterprises (from 51 to 250 employees) | 26 | 19.26% |
| Large enterprises (more than 251 employees)         | 23 | 17.04% |

135

#### Organization's area (m<sup>2</sup>)

| <b>Management system certified</b> |    |        |
|------------------------------------|----|--------|
| ISO 9001                           | 80 | 59.26% |
| ISO 14001                          | 60 | 44.44% |
| ISO 45001                          | 47 | 34.81% |
| ISO 22000                          | 9  | 6.67%  |
| Others                             | 2  | 1.48%  |
| None                               | 54 | 40.00% |

| <b>Level of development</b>   |    |        |
|-------------------------------|----|--------|
| Existence (0-3 years)         | 7  | 5.19%  |
| Survival (3-5 years)          | 11 | 8.15%  |
| Success (5-10 years)          | 30 | 22.22% |
| Maturity (more than 10 years) | 87 | 64.44% |

135

| Average age of equipment   |     |        |
|----------------------------|-----|--------|
| Up to 5 years old          | 23  | 17.04% |
| Between 5 and 10 years old | 54  | 40.00% |
| More than 10 years old     | 58  | 42.96% |
|                            | 135 |        |

| Number of used energy sources |     |        |
|-------------------------------|-----|--------|
| 1-2                           | 93  | 68.89% |
| 3                             | 32  | 23.70% |
| 4                             | 10  | 7.41%  |
|                               | 135 |        |

List the main sources of energy

List the main types of waste

| Number of significant energy consumers |     |        |
|----------------------------------------|-----|--------|
| ≤ 5                                    | 94  | 69.63% |
| 6-10                                   | 20  | 14.81% |
| ≥11                                    | 21  | 15.56% |
|                                        | 135 |        |

| Average annual energy consumption |     |        |
|-----------------------------------|-----|--------|
| ≤ 200 TJ;                         | 37  | 27.41% |
| 200 TJ ≤ 2,000 TJ;                | 47  | 34.81% |
| 2,000 TJ ≤ 10,000 TJ;             | 42  | 31.11% |
| >10,000 TJ.                       | 9   | 6.67%  |
|                                   | 135 |        |

Number of persons responsible for energy management
